# Supplementary material for: Deep-eutectic-solvent-based dispersive and emulsification liquid–liquid microextraction methods for the speciation of selenium in water and determining its total content levels in milk formula and cereals
Source: Royal Society of Chemistry journal article supplement (doi:10.1039/d0ay01517b), 2020-01-01
Supplement: d0ay01517b1.pdf [file d0ay01517b1.pdf]

**Table 1S** Effect of coexisting ions in determination of Se (IV) by using present method, N = 6

| Ions                          | Added as                                        | Concentration of ion<br>(mg L <sup>-1</sup> ) | Recovery (%) |
|-------------------------------|-------------------------------------------------|-----------------------------------------------|--------------|
| Na <sup>+</sup>               | NaCl                                            | 20,000                                        | 95.3 ± 3     |
| K <sup>+</sup>                | KCl                                             | 6000                                          | 98.5 ± 2     |
| Mg <sup>2+</sup>              | MgCl <sub>2</sub>                               | 3000                                          | 99.2 ± 3     |
| Ca <sup>2+</sup>              | CaCl <sub>2</sub>                               | 3000                                          | 98.4 ± 2     |
| Cl <sup>-</sup>               | NaCl                                            | 15,000                                        | 97.5 ± 2     |
| Ag <sup>+</sup>               | AgNO <sub>3</sub>                               | 50                                            | 97.2 ± 3.5   |
| Al <sup>3+</sup>              | Al <sub>2</sub> (SO <sub>4</sub> ) <sub>3</sub> | 100                                           | 97.4 ± 3.7   |
| Zn <sup>2+</sup>              | ZnSO <sub>4</sub>                               | 100                                           | 96.5 ± 2.6   |
| Fe <sup>3+</sup>              | FeCl <sub>3</sub>                               | 50                                            | 96.6 ± 3.4   |
| SO <sub>4</sub> <sup>2-</sup> | Na <sub>2</sub> SO <sub>4</sub>                 | 2000                                          | 96.4 ± 2.8   |
| CO <sub>3</sub> <sup>2-</sup> | CaCO <sub>3</sub>                               | 3000                                          | 99 ± 3.7     |
| NO <sub>3</sub> <sup>-</sup>  | KNO <sub>3</sub>                                | 4000                                          | 97.2 ± 2.8   |
| Cr <sup>3+</sup>              | CrCl <sub>3</sub>                               | 50                                            | 97.4 ± 2.6   |
| Cu <sup>2+</sup>              | CuSO <sub>4</sub>                               | 50                                            | 96.5 ± 3.4   |
| Pb <sup>2+</sup>              | Pb (NO <sub>3</sub> ) <sub>2</sub>              | 100                                           | 98.5 ± 3.6   |
| PO <sub>4</sub> <sup>3-</sup> | Na <sub>3</sub> PO <sub>4</sub>                 | 1500                                          | 98.6 ± 2.8   |
| Cd <sup>2+</sup>              | Cd (NO <sub>3</sub> ) <sub>2</sub>              | 100                                           | 98.3 ± 3.3   |

**Table 2S** Comparative table for Se in infants milk and baby food ( $\mu\text{g/Kg}$ )

| Source                                                                  | Concentration                 | Area of research | Reference                     |
|-------------------------------------------------------------------------|-------------------------------|------------------|-------------------------------|
| Infant formula A                                                        | 69.0 to 79.0                  | Spain            | Chavez et al., 2007[54]       |
| Infant formula B                                                        | 68.0 to 75.5                  |                  |                               |
| starting milk, follow-on milk, and soy-based infant formula             | 45.0 – 112                    | Spain            | Vinas et al., 2005 [55]       |
| Infant formula                                                          | 131 $\pm$ 6.84                | Korea            | Choi Younju et al., 2009 [56] |
| Cow milk-based formulae                                                 |                               |                  |                               |
| pre-term infants                                                        | 103 $\pm$ 19<br>77–121        |                  |                               |
| infant formulae for 0–6-month                                           | 68 $\pm$ 29<br>42 to 109      |                  |                               |
| Cow milk-based 7–12 months                                              | 115 $\pm$ 44<br>( 84 to 146)  | Argentina        | Hevia et al., 2012 [57]       |
| Soybased infant milk formulae                                           | 56 $\pm$ 6<br>52 to 63        |                  |                               |
| Cow milk based infant formula                                           | 89 – 332                      |                  |                               |
| Cow milk based follow up infant formula                                 | 22- 169                       | New Zealand      | Tamari et al ., 2000 [58]     |
| Soy based infant formula                                                | 29 – 169                      |                  |                               |
| Soy based follow up infant formula                                      | 27 – 162                      |                  |                               |
| Cow based Infant formula                                                | 106 $\pm$ 8.35<br>28.0 – 184  | Thailand         | Nookabkaew et al., 2012 [59]  |
| Soy based infant milk                                                   | 88.5 $\pm$ 10.3<br>4.52 - 169 |                  |                               |
| For 4 month and onward baby, with added iron and prebiotic              | 120 $\pm$ 10.5                | Turkey           | Saracoglu et al.,2007 [60]    |
| For 0–4 month, bottle formula                                           | 230 $\pm$ 20                  |                  |                               |
| For premature, low birth weight baby                                    | 250 $\pm$ 0.20.5              |                  |                               |
| For newborn infant                                                      | 150 $\pm$ 10.6                |                  |                               |
| With added iron, milk based, follow-on formula for 6 month onwards baby | 240 $\pm$ 19.5                |                  |                               |
| <b>Baby Cereals</b>                                                     |                               |                  |                               |
| Iron fortified formula, with milk, cereal and fruited, spoon formula    | 130 $\pm$ 10.4                |                  |                               |
| Cereal with milk and mixed vegetable                                    | 160 $\pm$ 10.5                |                  |                               |
| Fruited cereal                                                          | 164 $\pm$ 20.2                |                  |                               |
| Cereal with milk and banana                                             | 160 $\pm$ 10.5                |                  |                               |
| starting formula milk                                                   | 72.4 -88.7                    | Present study    |                               |
| Follow on formula milk                                                  | 68.7 - 112                    |                  |                               |
| Cereals with different matrices                                         | 63.5 -98.4                    |                  |                               |
